# Supplementary material for: Recipient ADAMTS13 Single-Nucleotide Polymorphism Predicts Relapse after Unrelated Bone Marrow Transplantation for Hematologic Malignancy
Source: Int J Mol Sci. 2019 Jan 8;20(1):214. doi: 10.3390/ijms20010214 (PMC6337246; doi:10.3390/ijms20010214)
Supplement: Supplementary file 1 [file ijms-20-00214-s001.pdf]

## Supplementary Materials

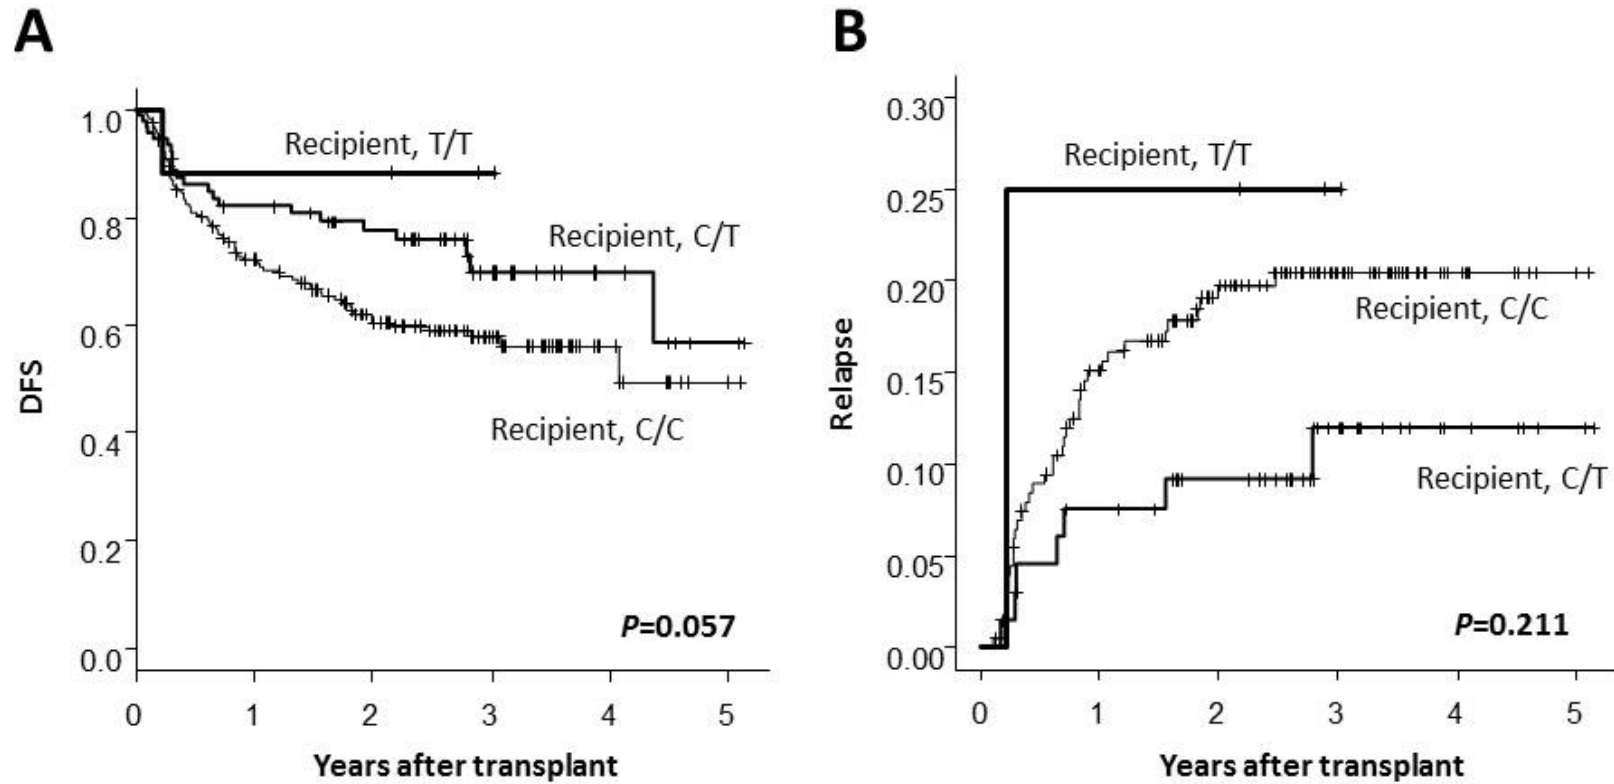

**Figure S1.** The Kaplan-Meier curves of the adjusted disease-free survival (DFS) rates (A) and the cumulative incidence curves of the adjusted relapse rates (B) after transplantation according to the recipient *ADAMTS13* genotype. The bold lines represent the T/T genotype, the middle lines represent the C/T genotype, and the thin lines represent the C/C genotype.

**Table S1.** The results of the multivariate analysis of the association of the recipient *ADAMTS13* genotype with the DFS and relapse incidence after transplantation.

| Variable                                       | DFS  |           |          | Relapse |           |          |
|------------------------------------------------|------|-----------|----------|---------|-----------|----------|
|                                                | HR   | 95% CI    | <i>P</i> | HR      | 95% CI    | <i>P</i> |
| Recipient <i>ADAMTS13</i> , C/C vs. C/T or T/T | 1.64 | 1.01-2.67 | 0.045    | 3.12    | 1.25-7.77 | 0.015    |
| Donor <i>ADAMTS13</i> , C/C vs. C/T or T/T     | 1.18 | 0.74-1.89 | 0.489    | 1.26    | 0.60-2.66 | 0.550    |
| Donor age                                      | 0.99 | 0.96-1.02 | 0.398    | 0.98    | 0.94-1.02 | 0.370    |
| Recipient age                                  | 1.01 | 1.00-1.03 | 0.043    | 1.00    | 0.98-1.03 | 0.660    |
| Donor sex, female vs. male                     | 0.98 | 0.62-1.54 | 0.932    | 0.77    | 0.34-1.77 | 0.540    |
| Recipient sex, female vs. male                 | 0.53 | 0.34-0.83 | 0.006    | 0.39    | 0.18-0.87 | 0.021    |
| Sex mismatch                                   | 1.48 | 0.95-2.31 | 0.855    | 3.27    | 1.37-7.79 | 0.007    |
| Year of transplant                             | 1.28 | 0.99-1.65 | 0.056    | 0.91    | 0.49-1.70 | 0.780    |
| Pretransplantation, recipient CMV status       | 1.13 | 0.64-2.02 | 0.671    | 1.05    | 0.40-2.74 | 0.920    |
| Disease stage, high-risk vs. low-risk          | 2.65 | 1.76-4.00 | <0.001   | 2.04    | 1.06-3.91 | 0.032    |

|                                                        |      |           |       |      |           |       |
|--------------------------------------------------------|------|-----------|-------|------|-----------|-------|
| MAC <i>vs.</i> RIC                                     | 1.05 | 0.65-1.69 | 0.844 | 1.05 | 0.49-2.22 | 0.910 |
| ABO major mismatch                                     | 1.04 | 0.67-1.63 | 0.856 | 1.27 | 0.66-2.46 | 0.480 |
| ABO minor mismatch                                     | 0.88 | 0.54-1.44 | 0.611 | 1.47 | 0.71-3.04 | 0.290 |
| TNC                                                    | 1.05 | 0.85-1.29 | 0.669 | 1.43 | 1.09-1.87 | 0.009 |
| Cyclosporine as GVHD prophylaxis <i>vs.</i> tacrolimus | 1.02 | 0.64-1.62 | 0.952 | 1.88 | 1.01-3.50 | 0.045 |
| PS 2-4                                                 | 2.15 | 1.03-4.52 | 0.043 | 3.43 | 1.34-8.79 | 0.010 |

---

CMV, cytomegalovirus; MAC, myeloablative conditioning; RIC, reduced-intensity conditioning; TNC, total number of nucleated cells harvested; GVHD, graft-versus-host disease; PS, performance status.

**Table S2.** The results of the subgroup analysis by recipient and donor sex regarding the association between recipient *ADAMTS13* variations and survival outcomes after transplantation.

| Variable                                | n   | Adjusted 3-y | HR (95% CI)             | P            | Adjusted 3-y | HR (95% CI)             | P            | Adjusted 3-y | HR (95% CI)       | P     |
|-----------------------------------------|-----|--------------|-------------------------|--------------|--------------|-------------------------|--------------|--------------|-------------------|-------|
|                                         |     | DFS          |                         |              | OS           |                         |              | relapse      |                   |       |
| <b>Male recipient</b>                   | 150 | 55%          |                         |              | 55%          |                         |              | 21%          |                   |       |
| Recipient <i>ADAMTS13</i> , C/C         | 111 | <b>49%</b>   | <b>2.22 (1.12-4.41)</b> | <b>0.023</b> | <b>50%</b>   | <b>2.02 (1.01-4.02)</b> | <b>0.046</b> | 24%          | 3.93 (0.89-12.30) | 0.070 |
| Recipient <i>ADAMTS13</i> , C/T or T/T  | 39  | <b>75%</b>   |                         |              | <b>69%</b>   |                         |              | 11%          |                   |       |
| <b>Male recipient with female donor</b> | 40  | 46%          |                         |              | 51%          |                         |              | 28%          |                   |       |
| Recipient <i>ADAMTS13</i> , C/C         | 30  | 38%          | 3.85 (0.78-18.99)       | 0.098        | 45%          | 4.00 (0.69-23.3)        | 0.123        | 34%          | 4.00 (0.49-32.60) | 0.200 |
| Recipient <i>ADAMTS13</i> , C/T or T/T  | 10  | 72%          |                         |              | 71%          |                         |              | 10%          |                   |       |

**Male recipient with male**

110 57% 56% 18%

**donor**

Recipient *ADAMTS13*, C/C 81 54% 2.07 (0.90-2.78) 0.087 52% 1.95 (0.85-4.47) 0.112 21% 2.84 (0.44-18.28) 0.270

Recipient *ADAMTS13*, C/T or

29 66% 68% 11%

T/T

**Female recipient**

131 66% 67% 15%

Recipient *ADAMTS13*, C/C 95 67% 1.25 (0.60-2.62) 0.548 70% 0.98 (0.45-2.10) 0.951 16% 1.70 (0.42-6.85) 0.460

Recipient *ADAMTS13*, C/T or

36 70% 60% 14%

T/T

**Female recipient with male**

83 56% 66% 21%

**donor**

|                                                  |    |     |                  |       |     |                  |       |           |                         |              |
|--------------------------------------------------|----|-----|------------------|-------|-----|------------------|-------|-----------|-------------------------|--------------|
| Recipient <i>ADAMTS13</i> , C/C                  | 57 | 61% | 1.65 (0.66-4.10) | 0.282 | 65% | 1.16 (0.43-3.05) | 0.777 | 21%       | 2.94 (0.36-24.10)       | 0.310        |
| Recipient <i>ADAMTS13</i> , C/T or T/T           | 26 | 66% |                  |       | 54% |                  |       | 20%       |                         |              |
| <b><i>Female recipient with female donor</i></b> | 48 | 76% |                  |       | 78% |                  |       | 7%        |                         |              |
| Recipient <i>ADAMTS13</i> , C/C                  | 38 | 89% | 1.65 (0.30-8.91) | 0.564 | 91% | 1.00 (0.16-6.08) | 0.998 | <b>9%</b> | <b>599 (8.48-42280)</b> | <b>0.003</b> |
| Recipient <i>ADAMTS13</i> , C/T or T/T           | 10 | 94% |                  |       | 94% |                  |       | <b>0%</b> |                         |              |

---

DFS, disease-free survival; HR, hazard ratio; OS, overall survival; CI, confidence interval. Bold results regarding the genotype represent  $P < 0.05$ .
